# Supplementary material for: Halogen bonding controlled 2D self-assembled polymorphism of regioisomeric thienophenanthrene derivatives by coadsorption
Source: Royal Society of Chemistry journal article supplement (doi:10.1039/d1nj00203a), 2021-01-01
Supplement: d1nj00203a1.pdf [file d1nj00203a1.pdf]

## *Supporting Information*

# **Halogen bonding controlled the 2D self-assembled polymorphism of regioisomeric thienophenanthrene derivatives by adsorption**

*Peng Pang, Yi Wang, Xinrui Miao\*, Bang Li, Wenli Deng\**

*College of Materials Science and Engineering, South China University of Technology, Guangzhou  
510640, China.*

**Corresponding author:** Xinrui Miao ([msxrmiao@scut.edu.cn](mailto:msxrmiao@scut.edu.cn))

Wenli Deng ([wldeng@scut.edu.cn](mailto:wldeng@scut.edu.cn))

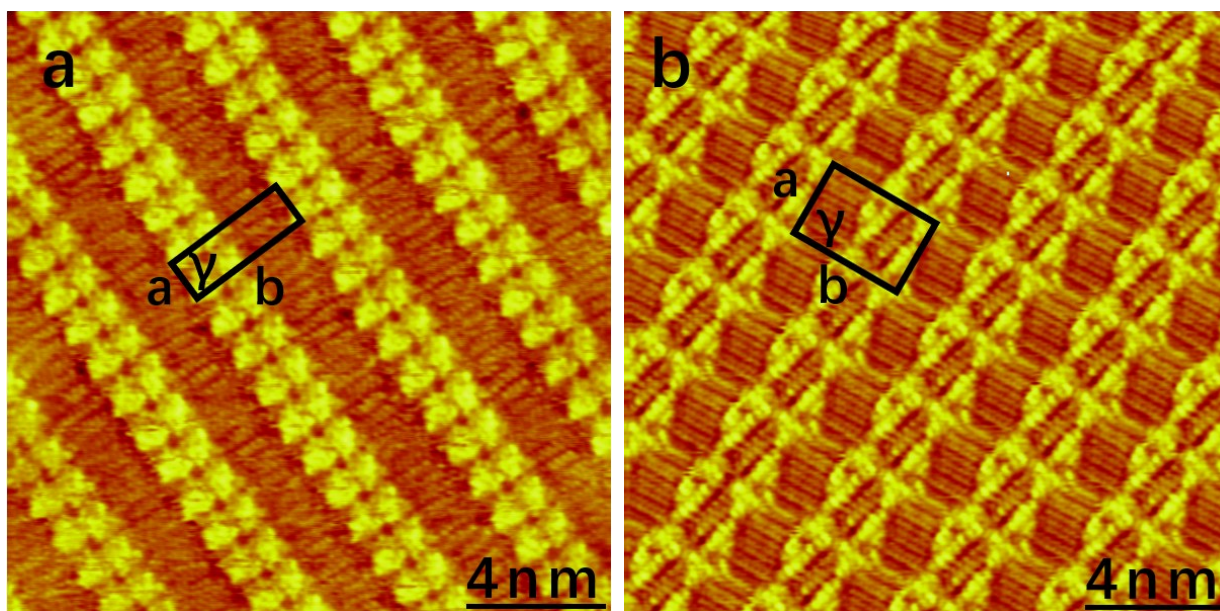

**Figure S1.** High-resolution STM images showing the self-assembled adlayers of (a) 6,9-DBTD-C14 and (b) 5,10-DBTD-C14 at the 1-phenyloctane/graphite interface.  $I_t = 500$  pA,  $V_b = 600$  mV.

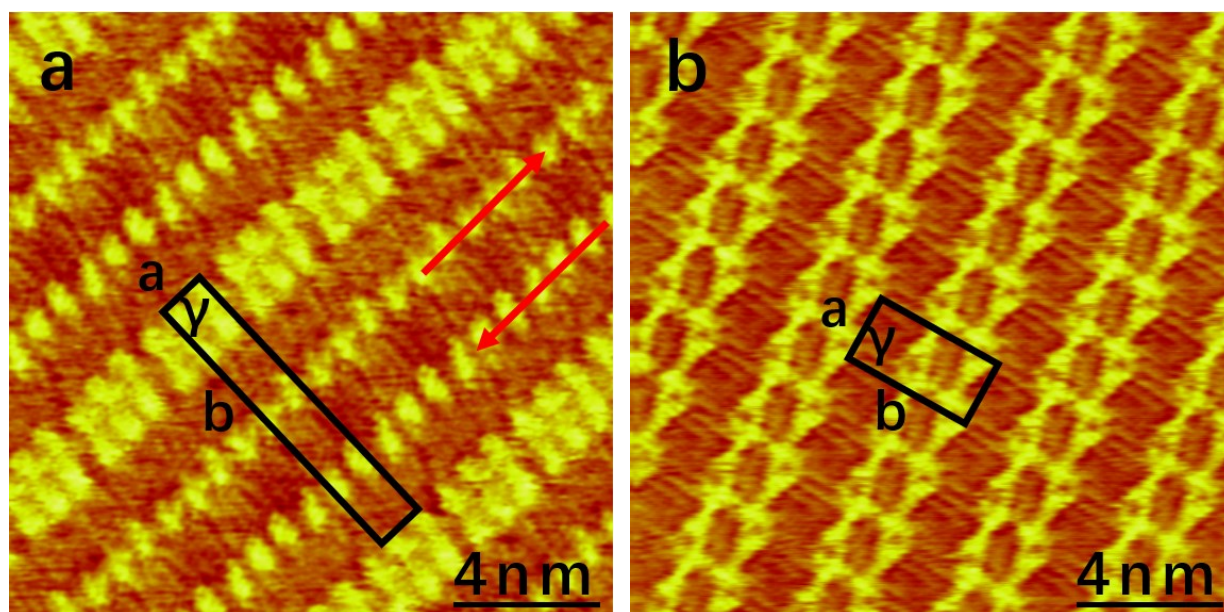

**Figure S2.** High-resolution STM images showing the self-assembled adlayers of (a) 6,9-DBTD-C14 and (b) 5,10-DBTD-C14 at the octanoic acid/graphite interface.  $I_t = 490$  pA,  $V_b = 610$  mV.

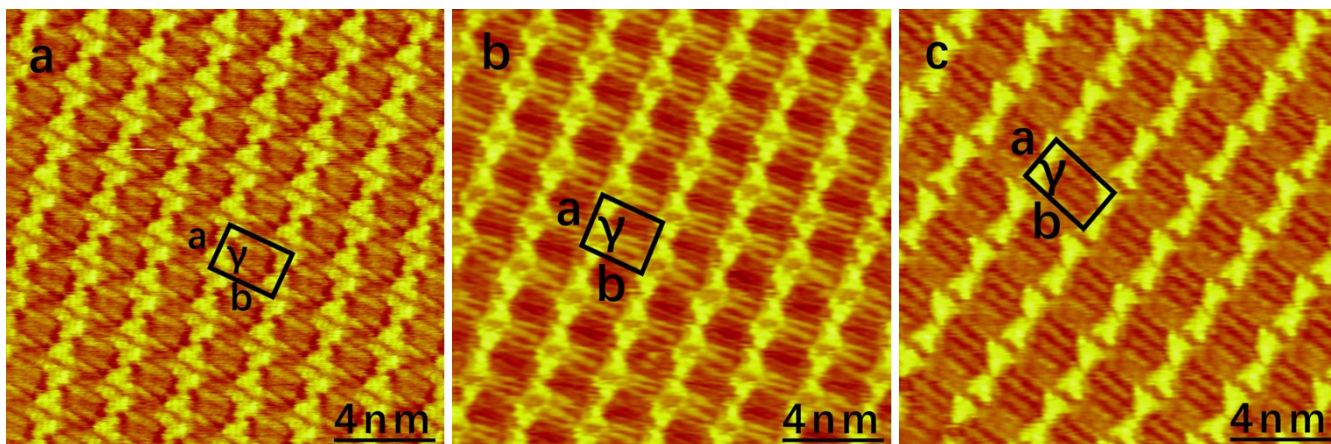

**Figure S3.** Typical high-resolution STM images showing the self-assembled adlayers of 6,9-DBTD-C14 at the (a) *n*-tetradecane/graphite interface, (b) *n*-pentadecane/graphite interface and (c) *n*-hexadecane/graphite interface.  $I_t = 488$  pA,  $V_b = 618$  mV.

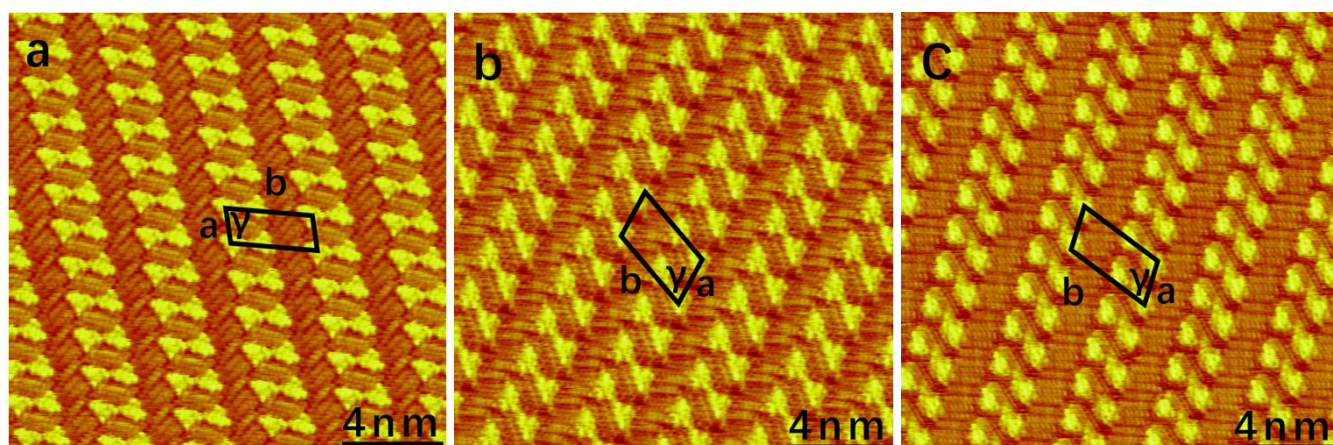

**Figure S4.** Typical high-resolution STM images showing the self-assembled adlayers of 5,10-DBTD-C14 at the (a) *n*-tetradecane/graphite interface, (b) *n*-pentadecane/graphite interface and (c) *n*-hexadecane/graphite interface.  $I_t = 486$  pA,  $V_b = 616$  mV.

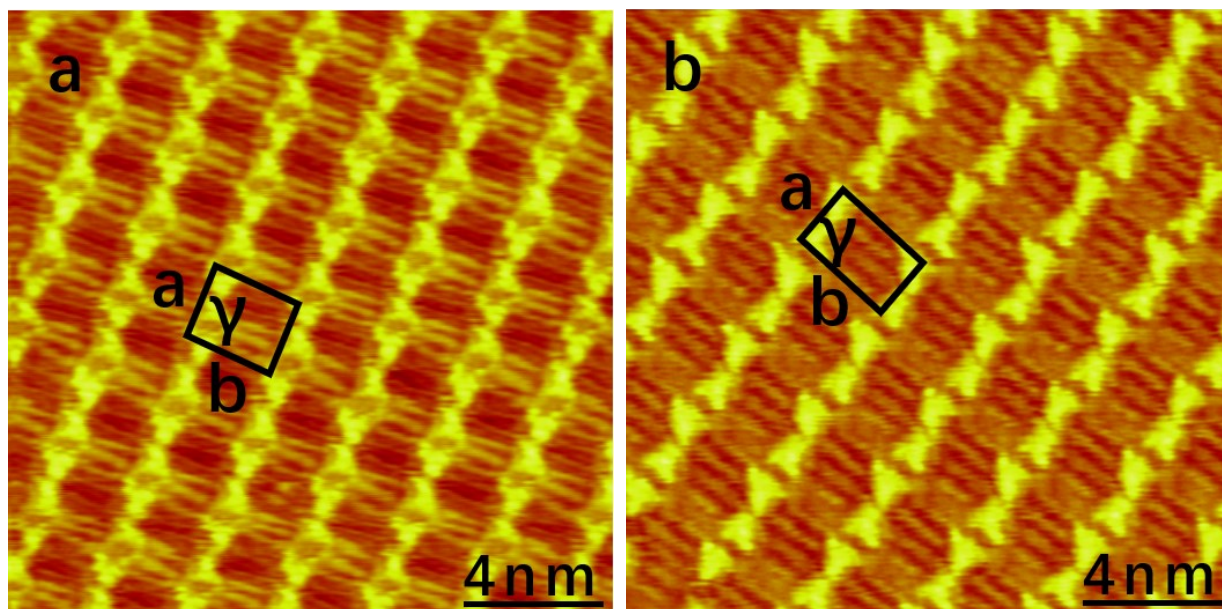

**Figure S5.** Typical high-resolution STM images showing the self-assembled adlayers of 6,9-DBTD-C14 at the (a) C15-Br/graphite interface and (b) C16-Br/graphite interface.  $I_t = 490$  pA,  $V_b = 614$  mV.
